# Supplementary material for: Electrochemical sensor based on N-doped carbon dots decorated with manganese oxide nanospheres for simultaneous detection of p-aminophenol and paracetamol
Source: Royal Society of Chemistry journal article supplement (doi:10.1039/d1an00966d), 2021-01-01
Supplement: d1an00966d1.pdf [file d1an00966d1.pdf]

# N-doped carbon dots decorated with manganese oxide nanospheres as electrochemical sensor for simultaneous detection of paracetamol and p-aminophenol

## Supplementary Data

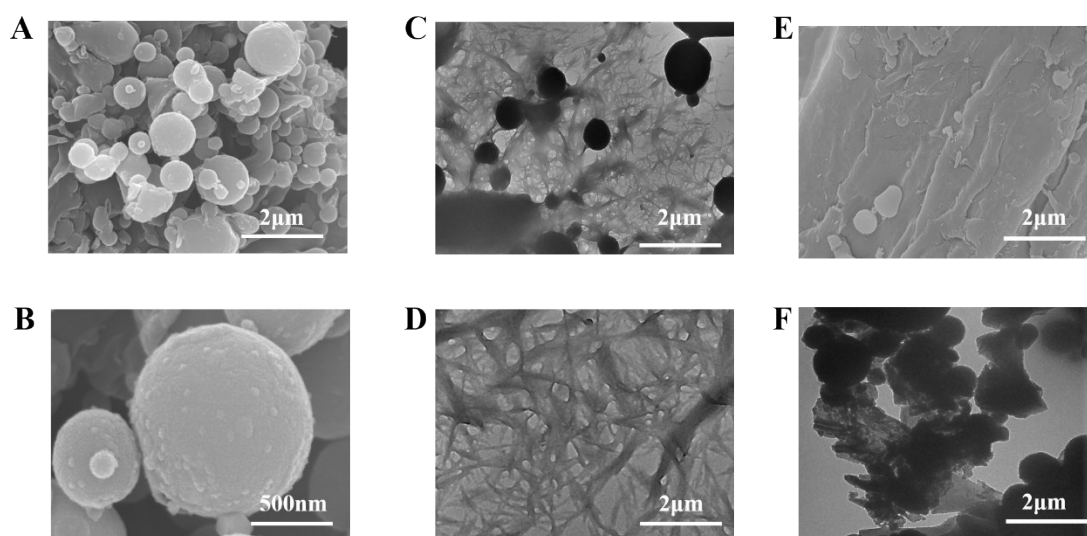

Fig. S1 SEM images of (A, B) N-CMOS, (E) PN-CMOS; TEM images of (C, D) N-CMOS, (F) PN-CMOS.

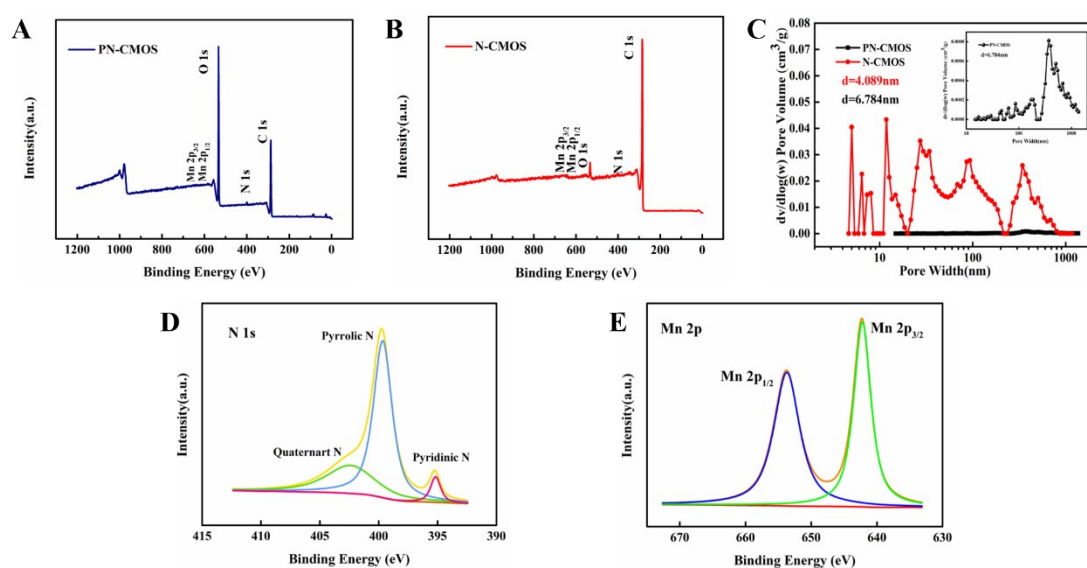

Fig. S2 XPS patterns of (A) PN-CMOS, (B) N-CMOS survey spectrum. (C)  $N_2$  adsorption-desorption curves of PN-CMOS and N-CMOS for average pore diameters

, (D, E) high-resolution Mn and N 3d.

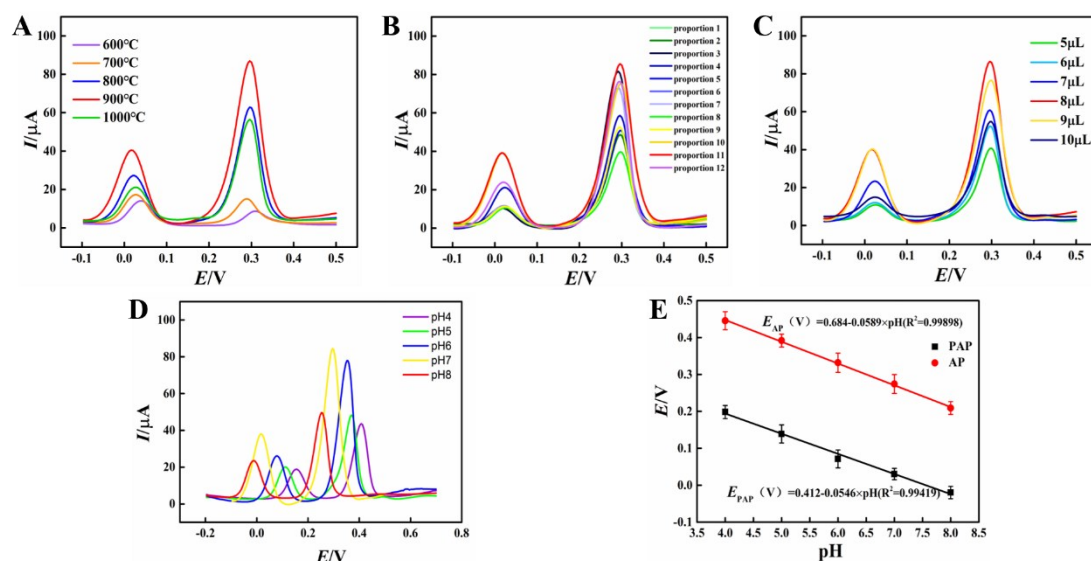

Fig. S3 DPV plots of GCE modified by N-CMOS (A) at different temperature, (D) at different pH (5.0, 5.5, 6, 6.5, 7, 7.5, 8, 8.5), (B) of different proportions material ratio of N-CMOS, (C) of different concentrations of coating N-CMOS amount in 0.15 mM AP and PAP solution. (E) the oxidation peak potential linear relationship with different pH in 0.15 mM AP and PAP solution.

Table S1 Comparison of detection of AP and PAP in tablets by the constructed sensor.

| Method     | Analyte | Determined ( $\mu\text{M}$ ) | Spiked ( $\mu\text{M}$ ) | Total found ( $\mu\text{M}$ ) | Recovery (%) |        |
|------------|---------|------------------------------|--------------------------|-------------------------------|--------------|--------|
| N-CMOS/GCE | AP      | 82.5                         | —                        | 84.17                         | 102.02       |        |
|            |         |                              |                          | 85.33                         | 103.43       |        |
|            |         |                              |                          | 83.33                         | 101.01       |        |
|            | PAP     | —                            | —                        | 0.55                          | 0.53         | 96.36  |
|            |         |                              |                          | 1.65                          | 1.67         | 101.12 |
|            |         |                              |                          | 3.3                           | 3.41         | 103.3  |
